# Supplementary material
Source: PubMed Central journal article supplement (PMC1560064)
Supplement: rspb20053361s01.pdf [file rspb20053361s01.pdf]

| core social group | no. of living adult females | percent (and no.) of females mtDNA typed | percent (and no.) of females microsatellite typed |
|-------------------|-----------------------------|------------------------------------------|---------------------------------------------------|
| AA                | 10                          | 90 (9)                                   | 100 (10)                                          |
| AB                | 5                           | 20 (1)                                   | 0 (0)                                             |
| AC                | 3                           | 100 (3)                                  | 100 (3)                                           |
| BB                | 12                          | 100 (12)                                 | 100 (12)                                          |
| BC                | 5                           | 100 (5)                                  | 60 (3)                                            |
| CA                | 3                           | 100 (3)                                  | 100 (3)                                           |
| CB                | 7                           | 100 (7)                                  | 100 (7)                                           |
| DB                | 6                           | 100 (6)                                  | 100 (6)                                           |
| DC                | 4                           | 0 (0)                                    | 25 (1)                                            |
| EA                | 11                          | 91 (10)                                  | 91 (10)                                           |
| EB                | 10                          | 100 (10)                                 | 100 (10)                                          |
| FA                | 4                           | 75 (3)                                   | 75 (3)                                            |
| FB                | 8                           | 100 (8)                                  | 100 (8)                                           |
| FD                | 4                           | 75 (3)                                   | 75 (3)                                            |
| GB                | 12                          | 100 (12)                                 | 100 (12)                                          |
| GC                | 5                           | 20 (1)                                   | 20 (1)                                            |
| HB                | 6                           | 33 (2)                                   | 33 (2)                                            |
| IAIC              | 5                           | 80 (4)                                   | 100 (5)                                           |
| JA                | 7                           | 100 (7)                                  | 100 (7)                                           |
| KA                | 4                           | 50 (2)                                   | 0 (0)                                             |
| KB                | 11                          | 100 (11)                                 | 100 (11)                                          |
| LA                | 2                           | 100 (2)                                  | 100 (2)                                           |
| LB                | 12                          | 25 (3)                                   | 17 (2)                                            |
| LC                | 5                           | 60 (3)                                   | 60 (3)                                            |
| LD                | 5                           | 100 (5)                                  | 100 (5)                                           |
| MA                | 3                           | 100 (3)                                  | 100 (3)                                           |
| MB                | 18                          | 44 (8)                                   | 61 (11)                                           |
| OA                | 9                           | 89 (8)                                   | 100 (9)                                           |
| OB                | 5                           | 80 (4)                                   | 80 (4)                                            |
| PA                | 15                          | 93 (14)                                  | 93 (14)                                           |
| PB                | 2                           | 100 (2)                                  | 100 (2)                                           |
| PC                | 10                          | 90 (9)                                   | 100 (10)                                          |
| QB                | 10                          | 80 (8)                                   | 70 (7)                                            |
| RA                | 6                           | 100 (6)                                  | 100 (6)                                           |
| SB                | 4                           | 75 (3)                                   | 75 (3)                                            |
| TA                | 2                           | 50 (1)                                   | 100 (2)                                           |
| TC                | 7                           | 14 (1)                                   | 14 (1)                                            |
| TD                | 5                           | 20 (1)                                   | 20 (1)                                            |
| UA                | 7                           | 100 (7)                                  | 100 (7)                                           |
| VA                | 16                          | 89 (14)                                  | 81 (13)                                           |
| WA                | 3                           | 67 (2)                                   | 33 (1)                                            |
| XA                | 6                           | 83 (5)                                   | 100 (6)                                           |
| YA                | 2                           | 100 (2)                                  | 100 (2)                                           |
| ZA                | 5                           | 60 (3)                                   | 40 (2)                                            |
| ZC                | 3                           | 100 (3)                                  | 100 (3)                                           |
